# Supplementary material
Source: PubMed Central journal article supplement (PMC2826318)
Supplement: NIHMS165188-supplement-1_si_001.pdf [file NIHMS165188-supplement-1_si_001.pdf]

## Supporting Information

### **AN ANTIBIOTIC-RESISTANCE ENZYME FROM A DEEP-SEA BACTERIUM** *Marta Toth,<sup>†</sup> Clyde Smith,<sup>\*,‡</sup> Hilary Frase,<sup>†</sup> Shahriar Mobashery,<sup>†</sup> and Sergei Vakulenko<sup>\*,†</sup>*

Department of Chemistry and Biochemistry, University of Notre Dame, Notre Dame, IN 46556, Stanford Synchrotron Radiation Lightsource, Stanford University, Menlo Park, CA 94025

Running head:  $\beta$ -lactamase from a deep-sea bacterium

Address correspondence to:

\*Clyde Smith, SSRL MS99, 2575 Sand Hill Rd, Menlo Park, CA 94025, USA. Fax: 650-926-3292; email csmith@slac.stanford.edu

\*Sergei Vakulenko, 417 Nieuwland Science Hall, Notre Dame IN 46566 USA. Fax: 574-631-6652; email svakulen@nd.edu

### **Caption For Supporting Figure S1**

Supporting Fig. S1. Amino acid sequence alignment for OIH-1  $\beta$ -lactamase with other  $\beta$ -lactamase enzymes. Sources: OIH, *Oceanobacillus iheyensis*; TEM-1, *E. coli.*; SHV-1, *Klebsiella pneumonia*; Blich, *Bacillus licheniformis* B2s; Bam, *B. amyloliquefaciens* FZB42; Ban, *B. anthracis* strain Ames. Conserved amino acid motifs are in red. The residues in blue in the OIH-1 sequence denote the amino acids not observed in the current structure.

## Supporting Fig. S1

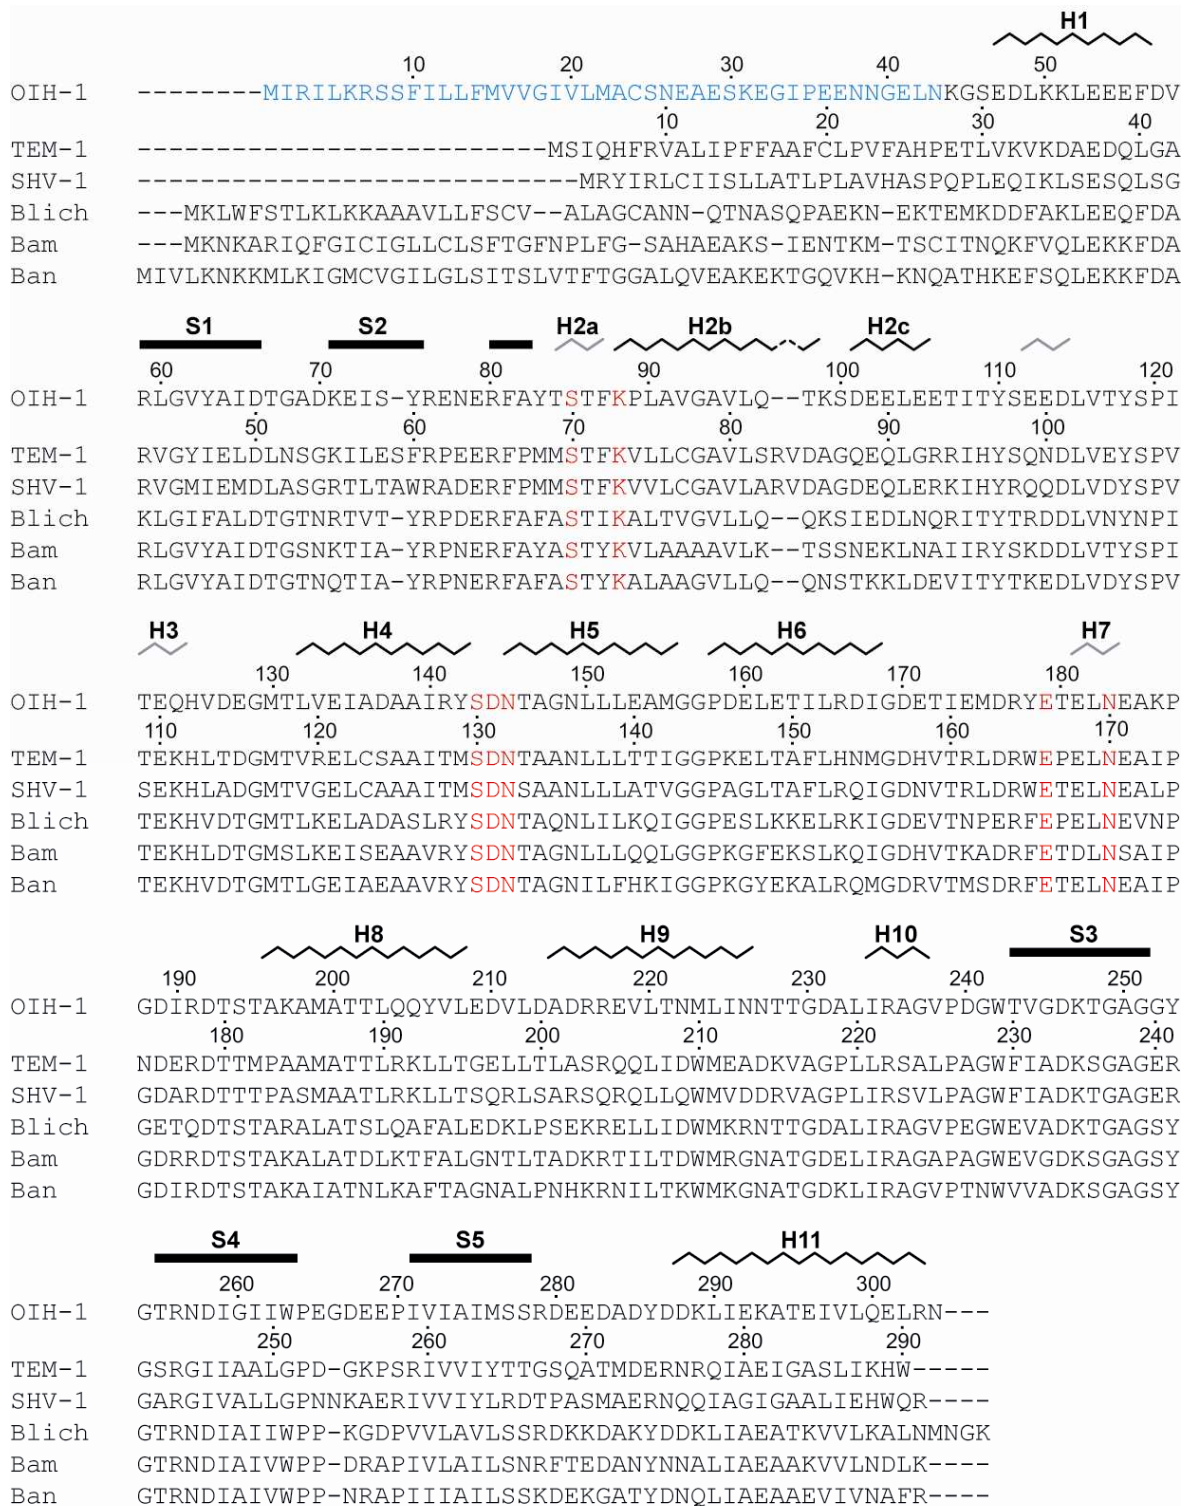

**Supporting Table S1.** Amino acid composition and intramolecular interactions of selected  $\beta$ -lactamases and *O. iheyensis* proteins

|                                        | $\beta$ -lactamase enzymes* |                 |                 |                 | <i>O. iheyensis</i> enzymes |               |
|----------------------------------------|-----------------------------|-----------------|-----------------|-----------------|-----------------------------|---------------|
|                                        | OIH-1                       | Blich<br>(1i2s) | TEM-1<br>(1btl) | SHV-1<br>(1shv) | DHPS<br>(3d0c)              | MCI<br>(3fyy) |
| Number of residues <sup>†</sup>        | 274                         | 282             | 286             | 286             | 608                         | 782           |
| Asp <sup>‡</sup>                       | 28 (10)                     | 23 (8)          | 16 (6)          | 16 (6)          | 36 (6)                      | 66 (8)        |
| Glu                                    | 38 (14)                     | 23 (8)          | 20 (7)          | 15 (5)          | 54 (9)                      | 48 (6)        |
| Lys                                    | 12 (4)                      | 25 (9)          | 11 (4)          | 7 (2)           | 30 (5)                      | 60 (8)        |
| Arg                                    | 13 (5)                      | 14 (5)          | 19 (7)          | 25 (9)          | 24 (4)                      | 34 (4)        |
| Asn                                    | 12 (4)                      | 17 (6)          | 8 (3)           | 7 (2)           | 36 (6)                      | 30 (4)        |
| Gln                                    | 5 (2)                       | 10 (4)          | 9 (3)           | 14 (5)          | 54 (9)                      | 24 (3)        |
| Ile                                    | 21 (8)                      | 14 (5)          | 17 (6)          | 16 (6)          | 50 (8)                      | 46 (6)        |
| Leu                                    | 24 (9)                      | 28 (10)         | 33 (12)         | 36 (13)         | 48 (8)                      | 86 (11)       |
| Val                                    | 14 (5)                      | 14 (5)          | 15 (5)          | 17 (6)          | 60 (10)                     | 58 (7)        |
| Aromatic residues                      | 16 (6)                      | 17 (6)          | 25 (9)          | 17 (6)          | 64 (11)                     | 102 (13)      |
| Total hydrogen bonds <sup>§</sup>      | 298 (1.09)                  | 303 (1.19)      | 306 (1.16)      | 323 (1.22)      | 1244 (2.04)                 | 783 (1.00)    |
| - main chain/side chain                | 184 / 114                   | 186 / 117       | 194 / 112       | 196 / 127       | 883 / 361                   | 480 / 303     |
| Salt bridges <sup>¶</sup>              | 33 / 18                     | 34 / 16         | 26 / 14         | 34 / 23         | 60 / 39                     | 59 / 28       |
| Hydrophobic interactions <sup>  </sup> | 218 / 102                   | 216 / 90        | 215 / 58        | 214 / 84        | 559 / 260                   | 341 / 154     |

\* Enzyme source; OIH-1, *Oceanobacillus iheyensis*; Blich, *Bacillus licheniformis* Bs3; TEM-1, *Escherichia coli*; SHV-1, *Klebsiella pneumoniae*; DHPS (dihydropicolinate synthase) and MCI (muconate cycloisomerase) are the only two *O. iheyensis* structures currently in the Protein Data Bank. <sup>†</sup> Residues in the mature enzyme. <sup>‡</sup> The numbers of residues are given as the total number in the sequence followed by their percent abundance in parentheses. <sup>§</sup> The number in parentheses is the ratio of hydrogen bonds to residues in the refined structure. <sup>¶</sup> Salt bridges, interactions  $< 6 \text{ \AA} / < 4 \text{ \AA}$ . <sup>||</sup> Hydrophobic interactions  $< 5 \text{ \AA} / < 4 \text{ \AA}$ .

**Supporting Table 2.** Surface properties of selected  $\beta$ -lactamases and *o. Iheyensis* enzymes

|                                             | OIH-1                  | Blich                  | TEM-1                  | SHV-1                  | DHPS                   | MCI                    |
|---------------------------------------------|------------------------|------------------------|------------------------|------------------------|------------------------|------------------------|
| Number of residues <sup>*</sup>             | 260                    | 260                    | 263                    | 265                    | 602                    | 782                    |
| Water molecules                             | 515                    | 152                    | 199                    | 81                     | 442                    | 578                    |
| D + E <sup>†</sup>                          | 62 / 55                | 43 / 37                | 36 / 30                | 31 / 23                | 90 / 84                | 110 / 86               |
| K + R <sup>†</sup>                          | 23 / 21                | 35 / 33                | 29 / 27                | 30 / 28                | 52 / 48                | 90 / 82                |
| Net charge                                  | -39                    | -8                     | -7                     | -1                     | -38                    | -20                    |
| Surface Charge                              | -34                    | -4                     | -2                     | 5                      | -36                    | -4                     |
| Surface acidic/basic ratio                  | 2.75                   | 1.15                   | 1.07                   | 0.85                   | 1.78                   | 1.04                   |
| Total surface area ( $\text{\AA}^2$ )       | 11160                  | 10820                  | 11575                  | 11110                  | 23620                  | 27080                  |
| Acidic surface area ( $\text{\AA}^2$ )      | 5070 / 46              | 3140 / 29              | 2300 / 20              | 1665 / 15              | 6460 / 27              | 6160 / 23              |
| Basic surface area ( $\text{\AA}^2$ )       | 1580 / 14              | 3200 / 30              | 2500 / 22              | 2490 / 22              | 4230 / 18              | 7010 / 26              |
| Net charge density ( $e/\text{\AA}^2$ )     | $-3.50 \times 10^{-3}$ | $-0.74 \times 10^{-3}$ | $-0.60 \times 10^{-3}$ | $-0.09 \times 10^{-3}$ | $-1.61 \times 10^{-3}$ | $-0.74 \times 10^{-3}$ |
| Surface charge density ( $e/\text{\AA}^2$ ) | $-3.05 \times 10^{-3}$ | $-0.46 \times 10^{-3}$ | $-0.17 \times 10^{-3}$ | $0.45 \times 10^{-3}$  | $-1.52 \times 10^{-3}$ | $-0.15 \times 10^{-3}$ |
| Acidic residues / $10^3 \text{\AA}^2$       | 4.9                    | 3.4                    | 2.5                    | 2.1                    | 3.6                    | 3.3                    |
| Basic residues / $10^3 \text{\AA}^2$        | 1.9                    | 3.0                    | 2.3                    | 2.4                    | 2.0                    | 3.2                    |

<sup>\*</sup> Number of residues in the refined structure. <sup>†</sup> Total number / number on the surface

**Supporting Table 3.** Kinetic parameters for the hydrolysis of ampicillin by the oih-1  $\beta$ -lactamase in the presence of NaCl

| NaCl (M) | $k_{\text{cat}}$ (sec <sup>-1</sup> ) | $K_{\text{m}}$ ( $\mu\text{M}$ ) | $k_{\text{cat}} / K_{\text{m}}$ (M <sup>-1</sup> s <sup>-1</sup> ) |
|----------|---------------------------------------|----------------------------------|--------------------------------------------------------------------|
| 0        | 94 $\pm$ 3                            | 15 $\pm$ 2                       | (6.3 $\pm$ 0.9) x 10 <sup>6</sup>                                  |
| 0.85     | 97 $\pm$ 3                            | 17 $\pm$ 3                       | (5.7 $\pm$ 1.0) x 10 <sup>6</sup>                                  |
| 1.7      | 97 $\pm$ 2                            | 24 $\pm$ 2                       | (4.0 $\pm$ 0.4) x 10 <sup>6</sup>                                  |
| 3.4      | 91 $\pm$ 2                            | 31 $\pm$ 3                       | (2.9 $\pm$ 0.3) x 10 <sup>6</sup>                                  |
| 5.1      | 89 $\pm$ 2                            | 56 $\pm$ 4                       | (1.6 $\pm$ 0.1) x 10 <sup>6</sup>                                  |

**Supporting Table 4.** Surface properties of selected halophilic proteins

|                                                       | dodecin<br>(1mog) | ferredoxin<br>(1doi) | MDH<br>(2j5k) | NDK<br>(2az1) | FTFT<br>(1ftr) | AmyB<br>(3bc9) | GlucDH<br>(2b5w) | DHFR<br>(1vdr) | CA<br>(1y7w) |
|-------------------------------------------------------|-------------------|----------------------|---------------|---------------|----------------|----------------|------------------|----------------|--------------|
| Kingdom                                               | archaea           | archaea              | archaea       | archaea       | archaea        | bacteria       | archaea          | archaea        | plantae      |
| Residues*                                             | 804               | 128                  | 1202          | 928           | 1184           | 585            | 710              | 315            | 274          |
| Water molecules                                       | 1176              | 237                  | 1023          | 105           | 706            | 574            | 1350             | 80             | 265          |
| Resolution (Å)                                        | 1.70              | 1.90                 | 2.00          | 2.35          | 1.70           | 1.35           | 1.65             | 2.55           | 1.86         |
| Oligomeric state                                      | 12                | 1                    | 4             | 6             | 4              | 1              | 2                | 2              | 1            |
| D + E <sup>†</sup>                                    | 192 / 192         | 34 / 34              | 248 / 232     | 204 / 186     | 208 / 192      | 100 / 82       | 124 / 112        | 60 / 58        | 33 / 30      |
| K + R <sup>†</sup>                                    | 48 / 48           | 6 / 6                | 92 / 80       | 84 / 66       | 84 / 80        | 45 / 36        | 58 / 48          | 28 / 28        | 17 / 16      |
| Net charge (e)                                        | -144              | -28                  | -156          | -120          | -124           | -55            | -66              | -32            | -16          |
| Surface charge (e)                                    | -144              | -28                  | -152          | -120          | -112           | -46            | -64              | -30            | -14          |
| Surface acidic/basic ratio                            | 4.00              | 5.67                 | 2.90          | 2.82          | 2.40           | 2.28           | 2.33             | 2.07           | 1.88         |
| Total surface area (Å <sup>2</sup> )                  | 30900             | 6330                 | 41630         | 32410         | 38545          | 23245          | 27980            | 15330          | 11870        |
| Acidic surface area (Å <sup>2</sup> / %)              | 16350 / 53        | 2935 / 46            | 17990 / 43    | 15300 / 47    | 14460 / 38     | 6230 / 27      | 9870 / 35        | 5510 / 36      | 2340 / 20    |
| Basic surface area (Å <sup>2</sup> / %)               | 1560 / 5          | 330 / 5              | 4530 / 11     | 3630 / 11     | 5810 / 15      | 2280 / 10      | 5090 / 18        | 2320 / 15      | 1050 / 9     |
| Charge density (x 10 <sup>-3</sup> e/Å <sup>2</sup> ) |                   |                      |               |               |                |                |                  |                |              |
| - net                                                 | -4.66             | -4.42                | -3.75         | -3.70         | -3.22          | -2.37          | -2.36            | -2.09          | -1.35        |
| - surface                                             | -4.66             | -4.42                | -3.65         | -3.70         | -2.91          | -1.98          | -2.29            | -1.96          | -1.18        |
| Acidic residues (per 10 <sup>3</sup> Å <sup>2</sup> ) | 6.2               | 5.4                  | 5.6           | 5.7           | 5.0            | 3.5            | 4.0              | 3.8            | 2.5          |
| Basic residues (per 10 <sup>3</sup> Å <sup>2</sup> )  | 1.6               | 0.9                  | 1.9           | 2.0           | 2.1            | 1.5            | 1.7              | 1.8            | 1.3          |
| Water molecules/residue                               | 1.46              | 1.85                 | 0.85          | 0.11          | 0.60           | 0.98           | 1.90             | 0.25           | 0.97         |

Protein source: dodecin and NDK (nucleoside diphosphate kinase) - *Halobacterium salinarum*; ferredoxin and MDH (malate dehydrogenase) - *Haloarcula marismortui*; FTFT (formylmethanofuran:tetrahydromethanopterin formyltransferase) - *Methanopyrus kandleri*; AmyB ( $\beta$ -amylase) - *Haloferax volcanii*; GlucDH (glucose dehydrogenase) - *Haloferax mediterranei*; DHFR (dihydrofolate reductase) - *Haloferax volcanii*; CA (carbonic anhydrase) - *Dunaliella salina*. \* number of residues in the refined structure. † total number / number on the surface.
